# Supplementary material
Source: MDPI journal article supplement (https://www.mdpi.com/2624-8549/3/1/17)
Supplement: s1 [file s1]

Supplementary Data for

# Stereospecificity in $[\text{Co}(\text{sep})][\text{Co}(\text{edta})]\text{Cl}_2 \cdot 2\text{H}_2\text{O}$ .

Peter Osvath, Allen Oliver, and A. Graham Lappin

Department of Chemistry and Biochemistry, University of Notre Dame, Notre Dame, 46556-5670, USA.

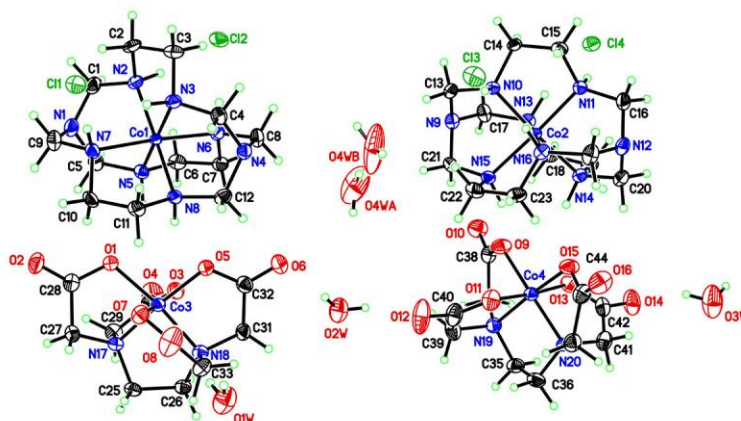

Figure S1. Labelling diagram for  $[\text{Co}(\text{sep})][\text{Co}(\text{edta})]\text{Cl}_2 \cdot 2\text{H}_2\text{O}$ . Atomic displacement ellipsoids depicted at 50 % probability.

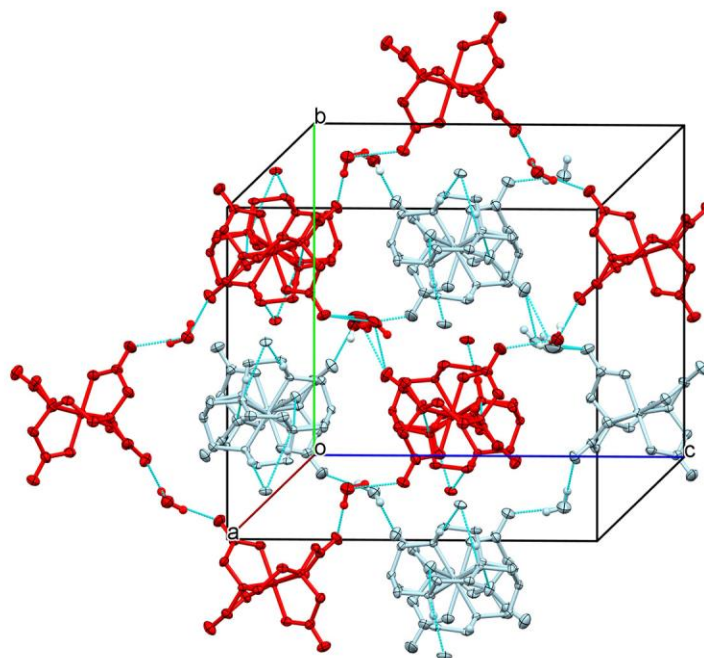

Figure S2. Packing diagram for  $[\text{Co}(\text{sep})][\text{Co}(\text{edta})]\text{Cl}_2 \cdot 2\text{H}_2\text{O}$ . Atomic displacement ellipsoids depicted at 50 % probability.

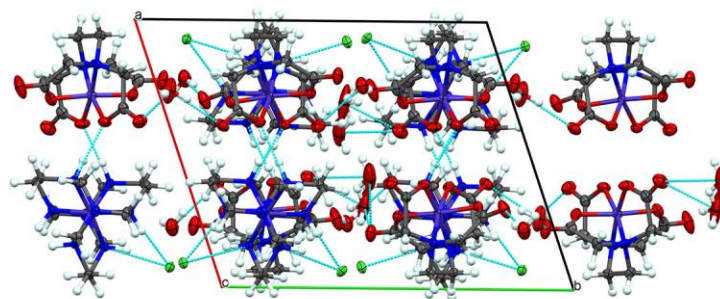

Figure S3. View along c-axis for  $[\text{Co}(\text{sep})][\text{Co}(\text{edta})]\text{Cl}_2 \cdot 2\text{H}_2\text{O}$ . Atomic displacement ellipsoids depicted at 50 % probability.

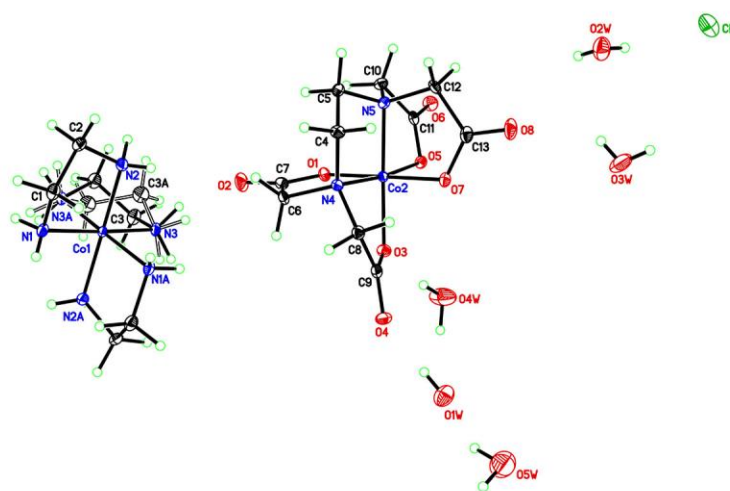

Figure S4. Labelling diagram for  $\Lambda$ - $[\text{Co}(\text{en})_3]\Lambda$ - $[\text{Co}(\text{edta})]_2\text{Cl} \cdot 10\text{H}_2\text{O}$ . Atomic displacement ellipsoids depicted at 50 % probability.
